# Supplementary material for: One-Year Adverse Outcomes Among US Adults With Post–COVID-19 Condition vs Those Without COVID-19 in a Large Commercial Insurance Database
Source: PubMed Central journal article supplement — JAMA Health Forum. 2023 Mar 3;4(3):e230010. doi: 10.1001/jamahealthforum.2023.0010 (PMC9984976; doi:10.1001/jamahealthforum.2023.0010), 2023-03-03
Supplement: jamahealthforum-e230010-s001.pdf [file jamahealthforum-e230010-s001.pdf]

## Supplemental Online Content

DeVries A, Shambhu S, Sloop S, Overhage JM. One-year adverse outcomes among US adults with post–COVID-19 condition vs those without COVID-19 in a large commercial insurance database. *JAMA Health Forum*. 2023;4(3):e230010. doi:10.1001/jamahealthforum.2023.0010

**eTable 1.** Baseline characteristics of initial Covid population vs post covid conditions (PCC) cohort

**eTable 2.** List of symptoms and Covid diagnosis used to identify PCC cases with their ICD 10 codes and description

**eTable 3.** Index month distributions among the overall cohort

**eFigure.** Propensity score balance checks for common support

**eTable 4.** Distribution of PCC symptoms during the weeks 5 to 12 post index among the PCC cohort

**eTable 5.** Sensitivity analysis among members with 6 months continuous enrollment

This supplemental material has been provided by the authors to give readers additional information about their work.

eTable 1. Baseline characteristics of initial Covid population vs post covid conditions (PCC) cohort

|                                                                  | Initial Covid Population |       | PCC           |       | Standardized Difference |
|------------------------------------------------------------------|--------------------------|-------|---------------|-------|-------------------------|
|                                                                  | n/mean                   | %/SD  | n/mean        | %/SD  |                         |
| Number of Patients                                               | <b>205,307</b>           |       | <b>13,435</b> |       |                         |
| <b>Age, (mean, Sd)</b>                                           | 44.9                     | 16.5  | 50.1          | 15.1  | -0.3312                 |
| <b>Age categories</b>                                            |                          |       |               |       |                         |
| 18-29                                                            | 45,375                   | 22.1% | 1,452         | 10.8% | 0.3082                  |
| 30-44                                                            | 55,582                   | 27.1% | 3,131         | 23.3% | 0.0869                  |
| 45-64                                                            | 83,305                   | 40.6% | 6,939         | 51.6% | -0.2235                 |
| 65-74                                                            | 12,006                   | 5.8%  | 1,212         | 9.0%  | -0.1212                 |
| 75+                                                              | 9,039                    | 4.4%  | 701           | 5.2%  | -0.0381                 |
| <b>Sex (Female %)</b>                                            | 109,438                  | 53.3% | 7,874         | 58.6% |                         |
| <b>Residence region</b>                                          |                          |       |               |       |                         |
| Northeast                                                        | 58,534                   | 28.5% | 4,290         | 31.9% | -0.0745                 |
| Midwest                                                          | 29,479                   | 14.4% | 1,890         | 14.1% | 0.0083                  |
| South                                                            | 68,808                   | 33.5% | 4,098         | 30.5% | 0.0646                  |
| West                                                             | 48,170                   | 23.5% | 3,156         | 23.5% | -0.0007                 |
| Missing                                                          | 316                      | 0.2%  | 1             | 0.0%  | 0.0516                  |
| <b>Zip-code level measures of social determinants of health:</b> |                          |       |               |       |                         |
| Race (proportion from census block group data)                   |                          |       |               |       |                         |
| Black                                                            | 0.14                     | 0.2   | 0.14          | 0.2   | 0.0000                  |
| White                                                            | 0.70                     | 0.3   | 0.70          | 0.3   | 0.0000                  |
| Asian                                                            | 0.06                     | 0.1   | 0.06          | 0.1   | 0.0000                  |
| Hispanic ethnicity (proportion from census block group data)     | 0.20                     | 0.2   | 0.20          | 0.2   | 0.0000                  |

|                                                |         |       |       |       |         |
|------------------------------------------------|---------|-------|-------|-------|---------|
| Education status                               |         |       |       |       |         |
| Education attainment High-school and above     | 0.87    |       | 0.87  | 0.1   | 0.0000  |
| Socio-economic status                          |         |       |       |       |         |
| 1 (most disadvantaged)                         | 38,747  | 18.9% | 2,737 | 20.4% | -0.0378 |
| 2                                              | 39,599  | 19.3% | 2,734 | 20.3% | -0.0266 |
| 3                                              | 47,681  | 23.2% | 3,264 | 24.3% | -0.0252 |
| 4 (least disadvantaged)                        | 67,946  | 33.1% | 4,531 | 33.7% | -0.0134 |
| 5 (missing)                                    | 11,334  | 5.5%  | 169   | 1.3%  | 0.2372  |
|                                                |         |       |       |       |         |
| <b>Elixhauser comorbidity score (mean, Sd)</b> | 1.2     | 1.9   | 2.4   | 2.7   | -0.5355 |
| <b>ECI categories</b>                          |         |       |       |       |         |
| 0                                              | 111,800 | 54.5% | 3,548 | 26.4% | 0.5964  |
| 1                                              | 38,658  | 18.8% | 2,903 | 21.6% | -0.0692 |
| 2                                              | 22,180  | 10.8% | 2,169 | 16.1% | -0.1569 |
| 3                                              | 12,978  | 6.3%  | 1,534 | 11.4% | -0.1800 |
| 4+                                             | 19,691  | 9.6%  | 3,281 | 24.4% | -0.4027 |
| <b>Baseline comorbidities</b>                  |         |       |       |       |         |
| Asthma                                         | 11,818  | 5.8%  | 1,777 | 13.2% | -0.2570 |
| Chronic obstructive lung disorder              | 18,395  | 9.0%  | 2,561 | 19.1% | -0.2942 |
| <b>Any cardiovascular disease</b>              | 12,804  | 6.2%  | 1,710 | 12.7% | -0.2229 |
| Coronary artery disease                        | 8,310   | 4.0%  | 1,173 | 8.7%  | -0.1924 |
| Peripheral vascular disorders                  | 5,527   | 2.7%  | 697   | 5.2%  | -0.1286 |
| Cerebrovascular disease                        | 1,926   | 0.9%  | 269   | 2.0%  | -0.0885 |
| Cirrhosis                                      | 518     | 0.3%  | 102   | 0.8%  | -0.0715 |
| Hypertension                                   | 47,828  | 23.3% | 5,278 | 39.3% | -0.3501 |

|                                                          |        |          |          |          |         |
|----------------------------------------------------------|--------|----------|----------|----------|---------|
| Chronic kidney disease                                   | 14,487 | 7.1%     | 1,879    | 14.0%    | -0.2273 |
| End stage renal disease on dialysis                      | 883    | 0.4%     | 159      | 1.2%     | -0.0843 |
| Diabetes type 1                                          | 1,513  | 0.7%     | 189      | 1.4%     | -0.0651 |
| Diabetes type 2                                          | 22,899 | 11.2%    | 2,772    | 20.6%    | -0.2615 |
| Severe obesity (BMI >=40)                                | 9,425  | 4.6%     | 1,385    | 10.3%    | -0.2191 |
| Cancer                                                   | 7,207  | 3.5%     | 964      | 7.2%     | -0.1635 |
| Arrhythmias                                              | 11,715 | 5.7%     | 1,664    | 12.4%    | -0.2345 |
| Inflammatory bowel disorder                              | 1,223  | 0.6%     | 129      | 1.0%     | -0.0415 |
| Rheumatoid arthritis                                     | 2,184  | 1.1%     | 364      | 2.7%     | -0.1212 |
| Pregnancy                                                | 3,731  | 1.8%     | 190      | 1.4%     | 0.0320  |
| Depression                                               | 17,905 | 8.7%     | 3,170    | 23.6%    | -0.4126 |
| Anxiety                                                  | 23,120 | 11.3%    | 3,753    | 27.9%    | -0.4296 |
| <b>Baseline all-cause 6-month utilization (mean, SD)</b> |        |          |          |          |         |
| Inpatient hospitalizations count                         | 0.07   | 0.39     | 0.18     | 0.63     | -0.2100 |
| Emergency department visits count                        | 0.15   | 0.5      | 0.35     | 1.0      | -0.2548 |
| Office visits count                                      | 3      | 3.5      | 6        | 6.1      | -0.6543 |
| <b>Baseline all-cause 6-month cost (mean, SD) (PMPM)</b> |        |          |          |          |         |
| Overall Medical Cost                                     | \$ 709 | \$ 4,002 | \$ 2,093 | \$ 7,984 | -0.2192 |

eTable 2. List of symptoms and Covid diagnosis used to identify PCC cases with their ICD 10 codes and description

| Symptoms               | ICD10 codes | Code Description                   |
|------------------------|-------------|------------------------------------|
| Anosmia and Parageusia | R43.0       | Anosmia                            |
|                        | R43.2       | Parageusia                         |
| Cough                  | R05         | Cough                              |
| Covid Dx               | B34.2       | Coronavirus infection, unspecified |

|                 |         |                                                                                                             |
|-----------------|---------|-------------------------------------------------------------------------------------------------------------|
|                 | B97.21  | SARS-associated coronavirus as the cause of diseases classified elsewhere                                   |
|                 | B97.29  | Other coronavirus as the cause of diseases classified elsewhere                                             |
|                 | J12.81  | Pneumonia due to SARS-associated coronavirus                                                                |
|                 | U07.1   | COVID-19                                                                                                    |
| Covid Sequelae  | B94.8   | Sequelae of other specified infectious and parasitic diseases                                               |
| Diarrhea        | K59.1   | Functional diarrhea                                                                                         |
|                 | R19.7   | Diarrhea, unspecified                                                                                       |
| Fever or chills | R50.9   | Fever, unspecified                                                                                          |
|                 | R56.00  | Simple febrile convulsions                                                                                  |
|                 | R50.81  | Fever presenting with conditions classified elsewhere                                                       |
|                 | R50.2   | Drug induced fever                                                                                          |
|                 | R50.84  | Febrile nonhemolytic transfusion reaction                                                                   |
| Headaches       | G44.009 | Cluster headache syndrome, unspecified, not intractable                                                     |
|                 | G44.301 | Post-traumatic headache, unspecified, intractable                                                           |
|                 | G44.319 | Acute post-traumatic headache, not intractable                                                              |
|                 | G44.59  | Other complicated headache syndrome                                                                         |
|                 | G44.81  | Hypnic headache                                                                                             |
|                 | G44.82  | Headache associated with sexual activity                                                                    |
|                 | G44.83  | Primary cough headache                                                                                      |
|                 | G44.85  | Primary stabbing headache                                                                                   |
|                 | R51     | Headache                                                                                                    |
|                 | G44.001 | Cluster headache syndrome, unspecified, intractable                                                         |
|                 | G44.021 | Chronic cluster headache, intractable                                                                       |
|                 | G44.049 | Chronic paroxysmal hemicrania, not intractable                                                              |
|                 | G44.051 | Short lasting unilateral neuralgiform headache with conjunctival injection and tearing (SUNCT), intractable |
|                 | G44.211 | Episodic tension-type headache, intractable                                                                 |
|                 | G44.311 | Acute post-traumatic headache, intractable                                                                  |

|  |         |                                                                                                                 |
|--|---------|-----------------------------------------------------------------------------------------------------------------|
|  | G44.52  | New daily persistent headache (NDPH)                                                                            |
|  | G44.53  | Primary thunderclap headache                                                                                    |
|  | G44.091 | Other trigeminal autonomic cephalgias (TAC), intractable                                                        |
|  | G44.099 | Other trigeminal autonomic cephalgias (TAC), not intractable                                                    |
|  | G44.209 | Tension-type headache, unspecified, not intractable                                                             |
|  | G44.221 | Chronic tension-type headache, intractable                                                                      |
|  | G44.321 | Chronic post-traumatic headache, intractable                                                                    |
|  | G44.40  | Drug-induced headache, not elsewhere classified, not intractable                                                |
|  | G44.84  | Primary exertional headache                                                                                     |
|  | G44.89  | Other headache syndrome                                                                                         |
|  | G44.1   | Vascular headache, not elsewhere classified                                                                     |
|  | R51.0   | Headache with orthostatic component, not elsewhere classified                                                   |
|  | R51.9   | Headache, unspecified                                                                                           |
|  | G44.019 | Episodic cluster headache, not intractable                                                                      |
|  | G44.041 | Chronic paroxysmal hemicrania, intractable                                                                      |
|  | G44.059 | Short lasting unilateral neuralgiform headache with conjunctival injection and tearing (SUNCT), not intractable |
|  | G44.201 | Tension-type headache, unspecified, intractable                                                                 |
|  | G44.309 | Post-traumatic headache, unspecified, not intractable                                                           |
|  | G44.329 | Chronic post-traumatic headache, not intractable                                                                |
|  | G44.41  | Drug-induced headache, not elsewhere classified, intractable                                                    |
|  | G44.51  | Hemicrania continua                                                                                             |
|  | G44.011 | Episodic cluster headache, intractable                                                                          |
|  | G44.029 | Chronic cluster headache, not intractable                                                                       |
|  | G44.031 | Episodic paroxysmal hemicrania, intractable                                                                     |

|                                                   |         |                                                       |
|---------------------------------------------------|---------|-------------------------------------------------------|
|                                                   | G44.039 | Episodic paroxysmal hemicrania, not intractable       |
|                                                   | G44.219 | Episodic tension-type headache, not intractable       |
|                                                   | G44.229 | Chronic tension-type headache, not intractable        |
| Joint Pain                                        | M25.50  | Pain in unspecified joint                             |
| Muscle and body aches                             | M79.10  | Myalgia, unspecified site                             |
|                                                   | M79.11  | Myalgia of mastication muscle                         |
|                                                   | M79.12  | Myalgia of auxiliary muscles, head and neck           |
|                                                   | M79.18  | Myalgia, other site                                   |
|                                                   | R52     | Pain, unspecified                                     |
| Myalgic encephalitis (chronic fatigue syndrome)   | R53.82  | Chronic fatigue, unspecified                          |
|                                                   | R53.83  | Other fatigue                                         |
|                                                   | G93.3   | Post viral fatigue syndrome                           |
| Night Sweats                                      | R61     | Generalized hyperhidrosis                             |
| Persistent chest pain or pressure                 | R07.89  | Other chest pain                                      |
|                                                   | R07.9   | Chest pain, unspecified                               |
| Shortness of breath or difficulty breathing codes | R06.00  | Dyspnea, unspecified                                  |
|                                                   | R06.01  | Orthopnea                                             |
|                                                   | R06.02  | Shortness of breath                                   |
|                                                   | R06.09  | Other forms of dyspnea                                |
| Sore Throat                                       | J02.9   | Acute pharyngitis, unspecified                        |
| Tachycardia                                       | I47.2   | Ventricular tachycardia                               |
|                                                   | I47.0   | Re-entry ventricular arrhythmia                       |
|                                                   | I47.1   | Supraventricular tachycardia                          |
|                                                   | I47.9   | Paroxysmal tachycardia, unspecified                   |
| Anxiety                                           | F40.241 | Acrophobia                                            |
|                                                   | F43.0   | Acute stress reaction                                 |
|                                                   | F40.01  | Agoraphobia with panic disorder                       |
|                                                   | F40.02  | Agoraphobia without panic disorder                    |
|                                                   | F40.00  | Agoraphobia, unspecified                              |
|                                                   | F40.290 | Androphobia                                           |
|                                                   | F06.4   | Anxiety disorder due to known physiological condition |
|                                                   | F41.9   | Anxiety disorder, unspecified                         |
|                                                   | F40.210 | Arachnophobia                                         |
|                                                   | F40.240 | Claustrophobia                                        |

|  |         |                                                   |
|--|---------|---------------------------------------------------|
|  | F44.9   | Dissociative and conversion disorder, unspecified |
|  | F42.4   | Excoriation (skin-picking) disorder               |
|  | F40.230 | Fear of blood                                     |
|  | F40.242 | Fear of bridges                                   |
|  | F40.243 | Fear of flying                                    |
|  | F40.231 | Fear of injections and transfusions               |
|  | F40.233 | Fear of injury                                    |
|  | F40.232 | Fear of other medical care                        |
|  | F40.220 | Fear of thunderstorms                             |
|  | F41.1   | Generalized anxiety disorder                      |
|  | F40.291 | Gynephobia                                        |
|  | F42.3   | Hoarding disorder                                 |
|  | R45.5   | Hostility                                         |
|  | F99     | Mental disorder, not otherwise specified          |
|  | F42.2   | Mixed obsessional thoughts and acts               |
|  | F48.9   | Nonpsychotic mental disorder, unspecified         |
|  | F42     | Obsessive-compulsive disorder                     |
|  | F42.9   | Obsessive-compulsive disorder, unspecified        |
|  | F40.218 | Other animal type phobia                          |
|  | F93.8   | Other childhood emotional disorders               |
|  | F41.3   | Other mixed anxiety disorders                     |
|  | F40.228 | Other natural environment type phobia             |
|  | F42.8   | Other obsessive-compulsive disorder               |
|  | F40.8   | Other phobic anxiety disorders                    |
|  | F40.248 | Other situational type phobia                     |
|  | F45.8   | Other somatoform disorders                        |
|  | F41.8   | Other specified anxiety disorders                 |
|  | F48.8   | Other specified nonpsychotic mental disorders     |
|  | F40.298 | Other specified phobia                            |
|  | F41.0   | Panic disorder [episodic paroxysmal anxiety]      |
|  | F40.9   | Phobic anxiety disorder, unspecified              |
|  | F43.11  | Post-traumatic stress disorder, acute             |



|            |        |                                                                                     |
|------------|--------|-------------------------------------------------------------------------------------|
|            | F43.12 | Post-traumatic stress disorder, chronic                                             |
|            | F43.10 | Post-traumatic stress disorder, unspecified                                         |
|            | F40.11 | Social phobia, generalized                                                          |
|            | F40.10 | Social phobia, unspecified                                                          |
|            | R45.7  | State of emotional shock and stress, unspecified                                    |
|            | R45.2  | Unhappiness                                                                         |
|            | R45.6  | Violent behavior                                                                    |
| Depression | F43.21 | Adjustment disorder with depressed mood                                             |
|            | F43.23 | Adjustment disorder with mixed anxiety and depressed mood                           |
|            | F31.31 | Bipolar disorder, current episode depressed, mild                                   |
|            | F31.30 | Bipolar disorder, current episode depressed, mild or moderate severity, unspecified |
|            | F31.32 | Bipolar disorder, current episode depressed, moderate                               |
|            | F31.5  | Bipolar disorder, current episode depressed, severe, with psychotic features        |
|            | F31.4  | Bipolar disorder, current episode depressed, severe, without psychotic features     |
|            | F31.61 | Bipolar disorder, current episode mixed, mild                                       |
|            | F31.62 | Bipolar disorder, current episode mixed, moderate                                   |
|            | F31.64 | Bipolar disorder, current episode mixed, severe, with psychotic features            |
|            | F31.63 | Bipolar disorder, current episode mixed, severe, without psychotic features         |
|            | F31.60 | Bipolar disorder, current episode mixed, unspecified                                |
|            | F31.76 | Bipolar disorder, in full remission, most recent episode depressed                  |
|            | F31.78 | Bipolar disorder, in full remission, most recent episode mixed                      |

|  |        |                                                                              |
|--|--------|------------------------------------------------------------------------------|
|  | F31.75 | Bipolar disorder, in partial remission, most recent episode depressed        |
|  | F31.77 | Bipolar disorder, in partial remission, most recent episode mixed            |
|  | F31.81 | Bipolar II disorder                                                          |
|  | F34.1  | Dysthymic disorder                                                           |
|  | F33.2  | Major depressive disorder, recurrent severe without psychotic features       |
|  | F33.42 | Major depressive disorder, recurrent, in full remission                      |
|  | F33.41 | Major depressive disorder, recurrent, in partial remission                   |
|  | F33.40 | Major depressive disorder, recurrent, in remission, unspecified              |
|  | F33.0  | Major depressive disorder, recurrent, mild                                   |
|  | F33.1  | Major depressive disorder, recurrent, moderate                               |
|  | F33.3  | Major depressive disorder, recurrent, severe with psychotic symptoms         |
|  | F33.9  | Major depressive disorder, recurrent, unspecified                            |
|  | F32.5  | Major depressive disorder, single episode, in full remission                 |
|  | F32.4  | Major depressive disorder, single episode, in partial remission              |
|  | F32.0  | Major depressive disorder, single episode, mild                              |
|  | F32.1  | Major depressive disorder, single episode, moderate                          |
|  | F32.3  | Major depressive disorder, single episode, severe with psychotic features    |
|  | F32.2  | Major depressive disorder, single episode, severe without psychotic features |
|  | F32.9  | Major depressive disorder, single episode, unspecified                       |
|  | F33.8  | Other recurrent depressive disorders                                         |

|           |         |                                                                       |
|-----------|---------|-----------------------------------------------------------------------|
| Brain Fog | F06.8   | Other specified mental disorders due to known physiological condition |
|           | R41.82  | Altered mental status, unspecified                                    |
|           | R41.0   | Disorientation, unspecified                                           |
|           | R41.840 | Attention and concentration deficit                                   |
| Insomnia  | G47.00  | Insomnia, unspecified                                                 |
|           | G47.01  | Insomnia due to medical condition                                     |
| Pneumonia | J18.0   | Bronchopneumonia, unspecified organism                                |
|           | J18.2   | Hypostatic pneumonia, unspecified organism                            |
|           | J84.111 | Idiopathic interstitial pneumonia, not otherwise specified            |
|           | J18.1   | Lobar pneumonia, unspecified organism                                 |
|           | J18.8   | Other pneumonia, unspecified organism                                 |
|           | J12.89  | Other viral pneumonia                                                 |
|           | J12.81  | Pneumonia due to SARS-associated coronavirus                          |
|           | J17     | Pneumonia in diseases classified elsewhere                            |
|           | J18.9   | Pneumonia, unspecified organism                                       |
|           | J12.9   | Viral pneumonia, unspecified                                          |
| Hypoxia   | R09.02  | Hypoxemia                                                             |

eTable 3. Index month distributions among the overall cohort

| Index Month | PCC   |     | NC    |     | Standardized Difference |
|-------------|-------|-----|-------|-----|-------------------------|
|             | n     | %   | n     | %   |                         |
| April       | 3,823 | 29% | 7,726 | 29% | -0.0066                 |
| May         | 2,446 | 18% | 4,876 | 18% | 0.0026                  |
| June        | 2,621 | 20% | 5,233 | 20% | 0.0000                  |
| July        | 4,545 | 34% | 9,035 | 34% | 0.0042                  |

eFigure. Propensity score balance checks for common support  
Before matching graph between PCC and NC cohort

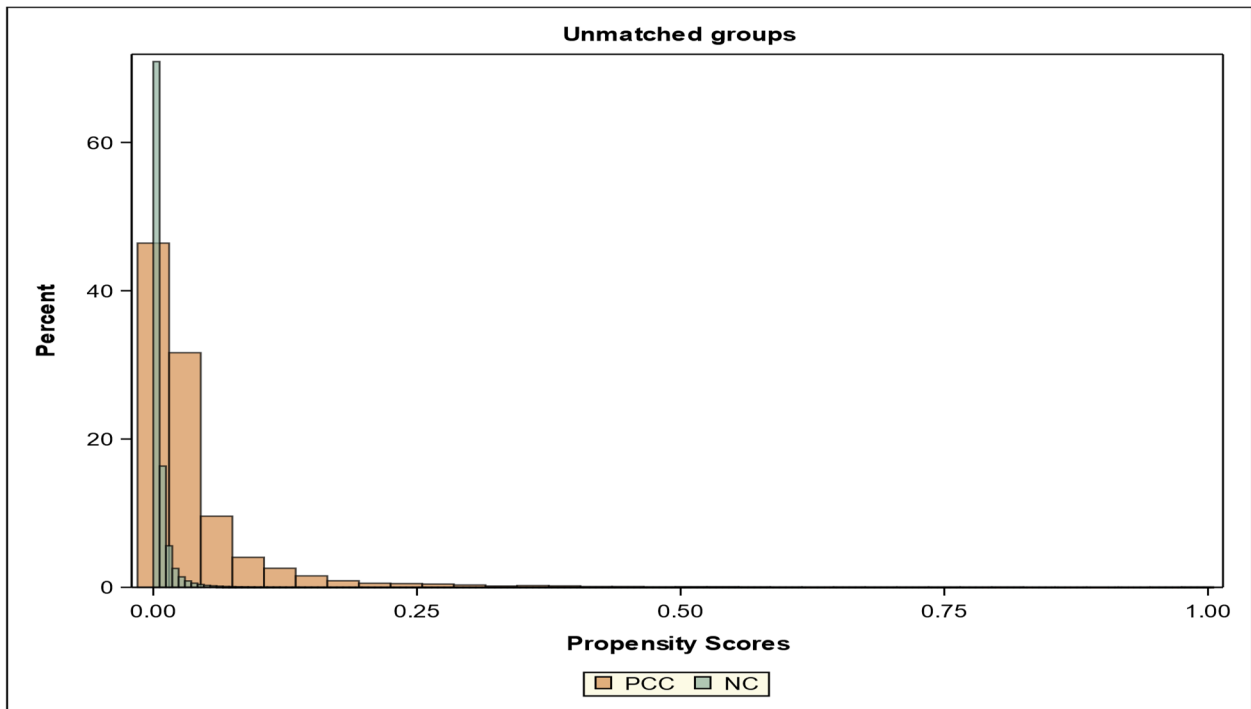

After matching graph between PCC and NC cohort

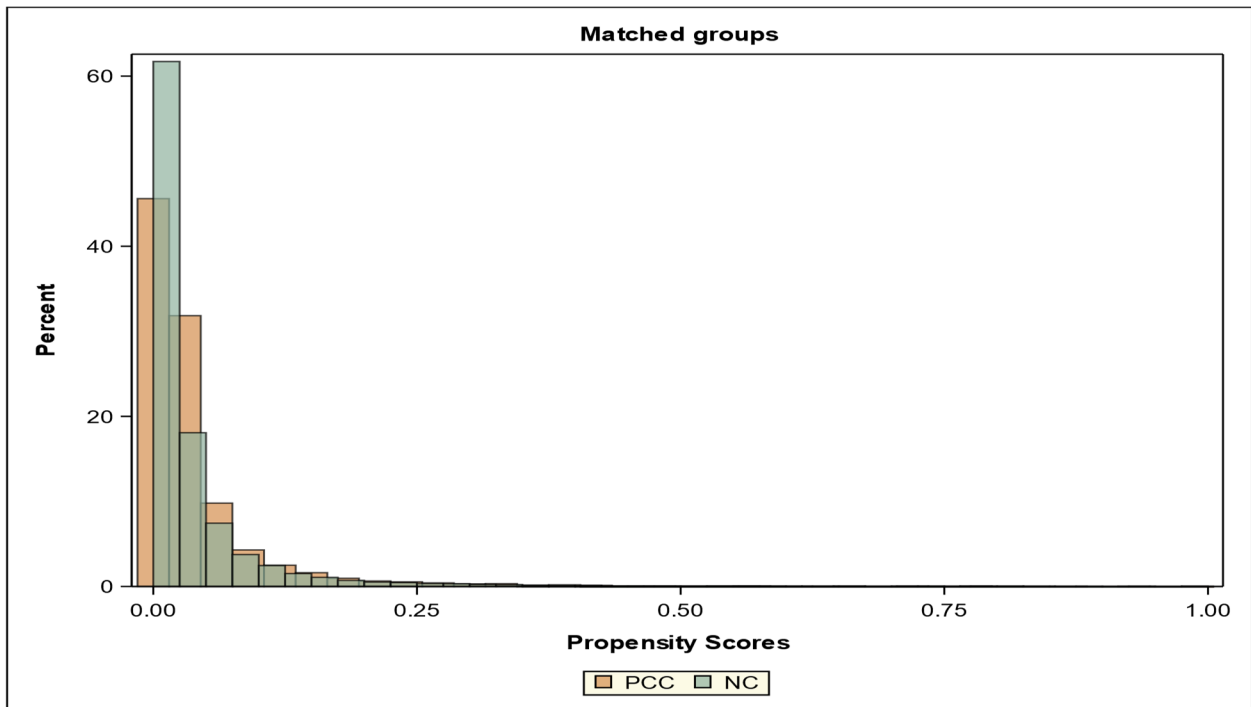

eTable 4. Distribution of PCC symptoms during the weeks 5 to 12 post index among the PCC cohort

| <b>Diagnosis and symptoms</b>     | <b>PCC</b>     |
|-----------------------------------|----------------|
| COVID Diagnosis                   | 12,376 (92.1%) |
| Hypoxia or Shortness of breath    | 5,825 (43.4%)  |
| Cough                             | 4,554 (33.9%)  |
| Muscle or Body aches Weakness     | 3,073 (22.9%)  |
| Fever or Chills                   | 3,004 (22.4%)  |
| Anxiety                           | 2,927 (21.8%)  |
| Depression                        | 2,282 (17%)    |
| Chronic Fatigue Syndrome          | 2,200 (16.4%)  |
| Persistent Chest Pain or Pressure | 2,273 (16.9%)  |
| Headache                          | 1,274 (9.5%)   |
| Diarrhea                          | 940 (7%)       |
| Sore Throat                       | 625 (4.7%)     |
| Brain Fog                         | 597 (4.4%)     |
| Insomnia                          | 469 (3.5%)     |
| Anosmia or Parageusia             | 282 (2.1%)     |
| Tachycardia                       | 255 (1.9%)     |
| Joint Pain                        | 184 (1.4%)     |
| Night Sweats                      | 51 (0.4%)      |

eTable 5. Sensitivity analysis among members with 6 months continuous enrollment

|                                    | <b>Individuals with Continuous Enrollment*</b> |                      |                      |                 |
|------------------------------------|------------------------------------------------|----------------------|----------------------|-----------------|
|                                    | <b>PCC (n=12,028)</b>                          | <b>NC (n=25,106)</b> | <b>Relative Risk</b> | <b>p -value</b> |
| <b>Outcomes of interest</b>        | <b>n (%)</b>                                   | <b>n (%)</b>         |                      |                 |
| <b>COPD</b>                        | 3,889 (32.3%)                                  | 4,220 (16.8%)        | 1.92                 | < 0.0001        |
| <b>Asthma (moderate/severe)</b>    | 2,954 (24.6%)                                  | 3,175 (12.6%)        | 1.94                 | < 0.0001        |
| <b>Pulmonary embolism/DVT</b>      | 905 (7.5%)                                     | 553 (2.2%)           | 3.42                 | < 0.0001        |
| <b>Cardiac arrhythmia</b>          | 3,461 (28.8%)                                  | 3,170 (12.6%)        | 2.28                 | < 0.0001        |
| <b>Coronary artery disease</b>     | 2,045 (17%)                                    | 2,459 (9.8%)         | 1.74                 | < 0.0001        |
| <b>Peripheral vascular Disease</b> | 1,194 (9.9%)                                   | 1,594 (6.3%)         | 1.56                 | < 0.0001        |
| <b>Ischemic stroke</b>             | 452 (3.8%)                                     | 441 (1.8%)           | 2.14                 | < 0.0001        |
| <b>Heart failure</b>               | 1,349 (11.2%)                                  | 1,500 (6%)           | 1.88                 | < 0.0001        |

\* Among members with 6 months continuous enrollment
