# Supplementary material for: One-Year Adverse Outcomes Among US Adults With Post–COVID-19 Condition vs Those Without COVID-19 in a Large Commercial Insurance Database
Source: PubMed Central journal article supplement — JAMA Health Forum. 2023 Mar 3;4(3):e230010. doi: 10.1001/jamahealthforum.2023.0010 (PMC9984976; doi:10.1001/jamahealthforum.2023.0010), 2023-03-03
Supplement: jamahealthforum-e230010-s002.pdf [file jamahealthforum-e230010-s002.pdf]

## Data Sharing Statement

DeVries. One-Year Adverse Outcomes Among US Adults With Post-COVID-19 Condition vs Those Without COVID-19 in a Large Commercial Insurance Database. *JAMA Health Forum*. Published March 03, 2023. doi:10.1001/jamahealthforum.2023.0010

### Data

**Data available:** No

### Additional Information

**Explanation for why data not available:** The raw data are protected and are not available due to data privacy laws. Investigators with an academic affiliation may contact the corresponding author for data access for the purposes of validating the above findings. Requests will be processed within 60 days.
